# Supplementary material
Source: publisher site journal article supplement (https://www.dovepress.com/article/240506)
Supplement: Supplementary file 1 [file get_supplementary_file.php]

**Supplementary materials**

**Table S1:** Composition of amlodipine besylate tablets prepared by different methods

| **Direct compression** | | **Water based wet granulation** | | **Isopropyl alcohol based wet granulation** | |
| --- | --- | --- | --- | --- | --- |
| Ingredients | Quantity for 500 tablets | Ingredients | Quantity for 500 tablets | Ingredients | Quantity for 500 tablets |
| Amlodipine besylate (g) | 3.5 | Amlodipine besylate (g) | 3.50 | Amlodipine besylate (g) | 3.5 |
| Dibasic calcium phosphate (g) | 61.5 | Dibasic calcium phosphate (g) | 59.5 | Dibasic calcium phosphate (g) | 53.5 |
| Eudragit® RSPO (g) | 30.0 | Eudragit® RSPO (g) | 30.0 | Eudragit® RSPO (g) | 30.0 |
| PVP K-30® (g) | 4.0 | PVP K-30® (g) | 6.0 | PVP K-30® (g) | 12.0 |
| Magnesium stearate (g) | 1.0 | Magnesium Stearate (g) | 1.0 | Magnesium stearate (g) | 1.0 |
| Total (g) | 100 | Water (ml) | 9 | Isopropyl alcohol (ml) | 30-35 |
|  |  | Total (g) | 100.0 | Total (g) | 100.0 |

**Table S2:** Formulation of simvastatin tablet by different methods

| **Aqueous wet granulation** | | **Isopropyl based wet granulation** | |
| --- | --- | --- | --- |
| Ingredients | Quantity for 500 tablets | Ingredients | Quantity for 500 tablets |
| Simvastatin (g) | 5.0 | Simvastatin (g) | 5.0 |
| Dibasic calcium phosphate (g) | 89.0 | Dibasic calcium phosphate (g) | 89.0 |
| Eudragit® S-100 (g) | 5.0 | Eudragit® S-100 (g) | 5.0 |
| Magnesium stearate (g) | 1.0 | Magnesium stearate (g) | 1.0 |
| Water (ml) | 28-30 | Isopropyl alcohol (ml) | 30-35 |
| Total (g) | 100.0 | Total (g) | 100.0 |

**Table S3:** Desired release characteristics

| Name | Desirbility | Lower  Limit | Upper  Limit |
| --- | --- | --- | --- |
| A:Polymer | is in range | 15 | 25 |
| B:DCP | is in range | 154 | 164 |
| ssssRel_at_1h | is target = 26.6 | 26.6 | 30.69 |
| Rel_at_2h | is target = 40 | 36.87 | 45.79 |
| Rel_at_4h | is target = 55 | 48.3 | 75.04 |
| Rel_at-6h | is target = 65 | 62.61 | 96.1 |
| Rel_at_8h | is target = 80 | 76.55 | 101.21 |

**Table S4:** Optimized levels of polymer and DCP to achive desired relase characteristics at all time intervals

| Sr.No | Polymer | DCP | Rel at 1h | Rel at 2h | Rel at 4h | Rel at 6h | Rel at 8h | Desirability |  |
| --- | --- | --- | --- | --- | --- | --- | --- | --- | --- |
| 1 | 24.040 | 154.960 | 28.226 | 38.4423 | 54.0155 | 67.8066 | 81.1894 | 0.740 | Selected |
| 2 | 16.259 | 162.741 | 29.6196 | 44.423 | 69.613 | 86.2815 | 93.7454 | 0.284 |  |
